# Supplementary material
Source: PubMed Central journal article supplement (PMC4306628)
Supplement: NIHMS627520-supplement-1.pdf [file NIHMS627520-supplement-1.pdf]

**Table 4:** Multivariate linear regression\* analysis for factors associated with visual acuity score (letters) at Year 1 among eyes with hemorrhage > 50% at baseline (N=78 with Year 1 visual acuity)

| <b>Factor</b>                                             | <b>Subjects</b> | <b>Mean Visual Acuity Score (Standard Error)</b> | <b>P value</b> |
|-----------------------------------------------------------|-----------------|--------------------------------------------------|----------------|
| Baseline visual acuity (per letter decrease)              | 78              | -0.76 (0.12)                                     | <0.0001        |
| Baseline area of choroidal neovascularization, disc areas |                 |                                                  |                |
| <=1                                                       | 38              | 69.8 (2.33)                                      | 0.03           |
| >1                                                        | 12              | 61.7 (4.19)                                      |                |
| Unknown                                                   | 28              | 60.7 (2.78)                                      |                |
| Taking AREDS supplements                                  |                 |                                                  |                |
| No                                                        | 24              | 60.1 (29.3)                                      | 0.04           |
| Yes                                                       | 54              | 67.5 (1.95)                                      |                |
| Treatment Group                                           |                 |                                                  |                |
| Ranibizumab monthly                                       | 20              | 63.8 (3.22)                                      | 0.87           |
| Bevacizumab monthly                                       | 16              | 67.8 (3.59)                                      |                |
| Ranibizumab as needed                                     | 21              | 65.0 (3.14)                                      |                |
| Bevacizumab as needed                                     | 21              | 65.3 (3.11)                                      |                |

\*The full, initial model included baseline visual acuity, baseline area of choroidal neovascularization, taking AREDS supplements, occult neovascularization, smoking status, total retinal thickness, treatment group.
